# Supplementary material for: Molecular Characterization and Expression Analysis of Putative Class C (Glutamate Family) G Protein-Coupled Receptors in Ascidian Styela clava
Source: MDPI journal article supplement (doi:10.3390/biology11050782), 2022-05-20
Supplement: s1 [file s1]

*Supplementary Materials*

# Molecular Characterization and Expression Analysis of Class C (Glutamate Family) G Protein-Coupled Receptors in Ascidian *Styela clava*

Jin Zhang <sup>1</sup>, Bo Dong <sup>1,2,3,\*</sup>, and Likun Yang <sup>1,\*</sup>

<sup>1</sup> Sars-Fang Centre, MoE Key Laboratory of Marine Genetics and Breeding, College of Marine Life Sciences, Ocean University of China, Qingdao 266003, China; zhangjincoolcool@163.com (J.Z.).

<sup>2</sup> Laboratory for Marine Biology and Biotechnology, Qingdao National Laboratory for Marine Science and Technology, Qingdao 266237, China.

<sup>3</sup> Institute of Evolution & Marine Biodiversity, Ocean University of China, Qingdao 266003, China.

\* Correspondence: bodong@ouc.edu.cn (B.D.); yanglikun@ouc.edu.cn (L. Y.)

**Citation:** Zhang, J.; Dong, B.; Yang, L. Molecular Characterization and Expression Analysis of Putative Class C (Glutamate Family) G Protein-Coupled Receptors in Ascidian *Styela clava*. *Biology* **2022**, *11*, 782. <https://doi.org/10.3390/biology11050782>

Academic Editor: De-Li Shi

Received: 17 April 2022

Accepted: 18 May 2022

Published: 20 May 2022

**Publisher's Note:** MDPI stays neutral with regard to jurisdictional claims in published maps and institutional affiliations.

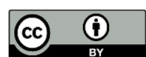

**Copyright:** © 2022 by the authors. Licensee MDPI, Basel, Switzerland. This article is an open access article distributed under the terms and conditions of the Creative Commons Attribution (CC BY) license (<https://creativecommons.org/licenses/by/4.0/>).

130 140 150 160 170 180 190 200 210 220 230 240

Hs-GRM1 HTLDRIADPELLNITLGCEIIDSCHSSVALEQSLIEFRDLSLISI--RDERD--GINRCLPDG--QSLPPGRTKKHIACVIGSGSSSVIAICVNLLQLFNIPQIA

Hs-GRM2 FALDRIADPELLPVLRLGARILDTCSRDTYALEQSLIEFVHASLTK--ADGSR--HICPGDG--YATHGDAPTAICGVIGSGSSSVIAICVNLLQLFNIPQIS

Hs-GRM3 FALDRIADPELLPVLRLGARILDTCSRDTYALEQSLIEFVHASLTK--VDEAE--YICPGDG--YAIQENPIPLIACGVIGSGSSSVIAICVNLLQLFNIPQIS

Hs-GRM4 FALDRIADPELLNITLGCEIIDSCHSSVALEQSLIEFVHASLTK--RDGTE--VFCGGG--PPIITKP-ERVVGVIGASSSSVIAICVNLLQLFNIPQIS

Hs-GRM5 HTJLRIADPELLNITLGCEIIDSCHSSVALEQSLIEFRDLSLISI--EEEE--GLVRCVD--GSSSFRRSKKHIACVIGSGSSSVIAICVNLLQLFNIPQIA

Hs-GRM6 FALDRIADPELLPVLRLGARILDTCSRDTYALEQSLIEFVHASLTK--DDEVG--VRCGGV--PPLRAPPEFVVVAICASSSVIAICVNLLQLFNIPQIS

Hs-GRM7 FALDRIADPELLNITLGCEIIDSCHSSVALEQSLIEFVHASLTK--RDTSV--VRCNGE--PEVVFVK-ERVVGVIGASSSSVIAICVNLLQLFNIPQIS

Hs-GRM8 FALDRIADPELLNITLGCEIIDSCHSSVALEQSLIEFVHASLTK--RDASD--VRCANGD--PPIITKP-DRISGVIGASSSSVIAICVNLLQLFNIPQIS

Ms-GRM1 HTLDRIADPELLNITLGCEIIDSCHSSVALEQSLIEFRDLSLISI--RDERD--GINRCLPDG--QTLPPGRTKKHIACVIGSGSSSVIAICVNLLQLFNIPQIA

Ms-GRM2 FALDRIADPELLPVLRLGARILDTCSRDTYALEQSLIEFVHASLTK--ADGSR--HICPGDG--YATLSADAPTAICGVIGSGSSSVIAICVNLLQLFNIPQIS

Ms-GRM3 FALDRIADPELLPVLRLGARILDTCSRDTYALEQSLIEFVHASLTK--VDEAE--YICPGDG--YAIQENPIPLIACGVIGSGSSSVIAICVNLLQLFNIPQIS

Ms-GRM4 FALDRIADPELLNITLGCEIIDSCHSSVALEQSLIEFVHASLTK--RDGTE--VFCGGG--PPIITKP-ERVVGVIGASSSSVIAICVNLLQLFNIPQIS

Ms-GRM5 HTJLRIADPELLNITLGCEIIDSCHSSVALEQSLIEFRDLSLISI--EEEE--GLVRCVD--GSSSFRRSKKHIACVIGSGSSSVIAICVNLLQLFNIPQIA

Ms-GRM6 FALDRIADPELLPVLRLGARILDTCSRDTYALEQSLIEFVHASLTK--DDEAS--VRCGGV--PPLRAAPPEFVVVAICASSSVIAICVNLLQLFNIPQIS

Ms-GRM7 FALDRIADPELLNITLGCEIIDSCHSSVALEQSLIEFVHASLTK--RDTSV--VRCNGE--PEVVFVK-ERVVGVIGASSSSVIAICVNLLQLFNIPQIS

Ms-GRM8 FALDRIADPELLNITLGCEIIDSCHSSVALEQSLIEFVHASLTK--RDASD--VRCANGD--PPIITKP-DRISGVIGASSSSVIAICVNLLQLFNIPQIS

Dr-GRM1 HTLDRIADPELLNITLGCEIIDSCHSSVALEQSLIEFRDLSLISI--RDERE--GPKVCGEN--PSAQPPDKKHIACVIGSGSSSVIAICVNLLQLFNIPQIA

Dr-GRM2 FALDRIADPELLPVLRLGARILDTCSRDTYALEQSLIEFVHASLTK--VDGSE--YICPGDG--YAIHDDPLTAICGVIGSGSSSVIAICVNLLQLFNIPQIS

Dr-GRM3 FALDRIADPELLPVLRLGARILDTCSRDTYALEQSLIEFVHASLTK--VDGTE--FICPGDG--YALQDPSPLTAICGVIGSGSSSVIAICVNLLQLFNIPQIS

Dr-GRM4 FALDRIADPELLNITLGCEIIDSCHSSVALEQSLIEFRDLSLISI--RDGTD--VFCGGG--PPIITKP-ERVVGVIGASSSSVIAICVNLLQLFNIPQIS

Dr-GRM5a HTLDRIADPELLNITLGCEIIDSCHSSVALEQSLIEFRDLSLISI--EEEE--GMARCTE--GGGTPMKGKHHIACVIGSGSSSVIAICVNLLQLFNIPQIA

Dr-GRM5b HTLDRIADPELLNITLGCEIIDSCHSSVALEQSLIEFRDLSLISI--DESEEEAGGARCG--PGATPMKGKHHIACVIGSGSSSVIAICVNLLQLFNIPQIA

Dr-GRM6a FALDRIADPELLNITLGCEIIDSCHSSVALEQSLIEFVHASLTK--RDTSV--IRGSGE--QPIITKP-ERVVGVIGASSSSVIAICVNLLQLFNIPQIS

Dr-GRM6b FALDRIADPELLNITLGCEIIDSCHSSVALEQSLIEFVHASLTK--RDNSD--VFCNGE--PPIITKP-ERVVGVIGASSSSVIAICVNLLQLFNIPQIS

Dr-GRM7 FALDRIADPELLNITLGCEIIDSCHSSVALEQSLIEFVHASLTK--RDTSV--VRCNGE--PEVVFVK-ERVVGVIGASSSSVIAICVNLLQLFNIPQIS

Dr-GRM8a FALDRIADPELLNITLGCEIIDSCHSSVALEQSLIEFVHASLTK--RDGSD--VRCANGD--QPIIFAKP-DRISGVIGASSSSVIAICVNLLQLFNIPQIS

Dr-GRM8b FALDRIADPELLNITLGCEIIDSCHSSVALEQSLIEFVHASLTK--RDSTD--VFCASGE--QPIIFAKP-DRISGVIGASSSSVIAICVNLLQLFNIPQIS

Fm-GRM2 FALDRIADPELLPVLRLGARILDTCSRDTYALEQSLIEFVHASLTK--VEETE--FVCPGDG--YAVQCKRPLTAICGVIGSGSSSVIAICVNLLQLFNIPQIS

Fm-GRM3 FALDRIADPELLPVLRLGARILDTCSRDTYALEQSLIEFVHASLTK--VDGTD--FVCPGDG--YAIHGNGAHHIACVIGSGSSSVIAICVNLLQLFNIPQIS

Fm-GRM5 HTLDRIADPELLNITLGCEIIDSCHSSVALEQSLIEFRDLSLISI--GDPKDAAAAAANAANAAPGVGRCQAPVAKRHHIACVIGSGSSSVIAICVNLLQLFNIPQIA

Fm-GRM8 FALDRIADPELLNITLGCEIIDSCHSSVALEQSLIEFVHASLTK--RDTSV--VRCNGE--AEVFTKP-ERISGVIGASSSSVIAICVNLLQLFNIPQIS

Cr-GRM3-1 YTIKRVNDVIMLPVLTITIDEMADCTIDTFAIRKIVQNYLPQQLSQ--QSTRNNSYKCVIGSGSSSVIAICVNLLQLFNIPQIS

Cr-GRM3-2 YTVQKRVSYNEMNITLGRFIEDTQNSQIALSTLGVLPKQCNHTHP--VCFPEPCPSIAGVIGPESSVIALSLAHNALLTETIS

Cr-GRM4

Cs-GRM3 FALDRIADPELLPVLRLGARILDTCSRDTYALEQSLIEFVHASLTK--LNDP--EPRLICGVIGASSSSVIAICVNLLQLFNIPQIS

Cs-GRM4 MILDVNRDRKILPEMELGTYMIDTAMSHITIGQIVTEFIPLFSEAT--TSCSTS--KTLSKK-SMFAIGASSSSVIAICVNLLQLFNIPQIS

Cs-GRM7a MILDRIADPELLNITLGCEIIDSCHSSVALEQSLIEFVHASLTK--ICQGN--SDNDSKHHILTAIGASSSSVIAICVNLLQLFNIPQIS

Cs-GRM7b MVVDVNRDENILPEITIGTIGTMINNRSGLIYIMQVINEFFPLSDLIQ--QCEQVN--FTNCKKPLFAGIAGASSSVIAICVNLLQLFNIPQIS



[illegible]



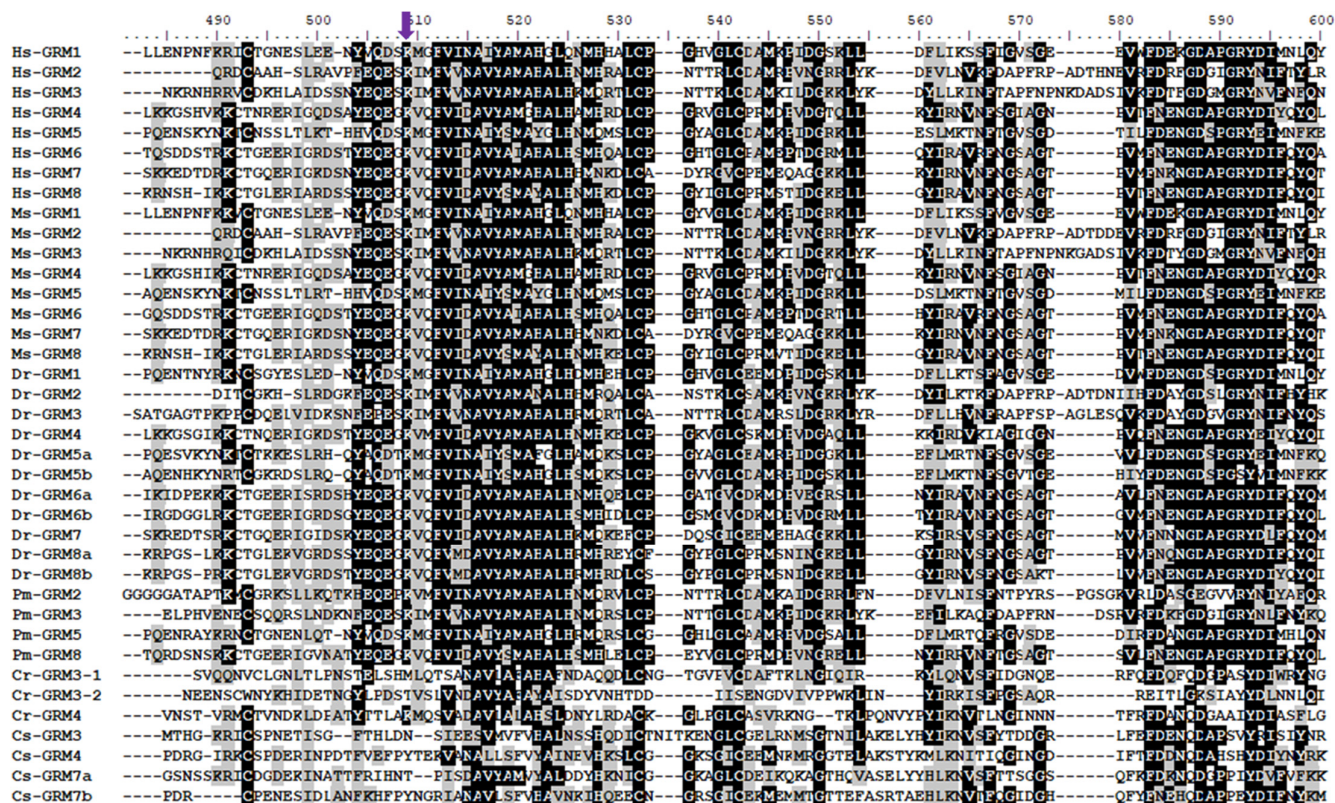

**Figure S1.** Sequence alignment of VFDs for representative GRMs in different species. The conserved residues are shaded. The critical amino residues for L-glutamate binding are indicated by arrows. These residues, from N-terminal to C-terminal, are arginine (R), serine (S), threonine (T), aspartate (D), tyrosine (Y), aspartate (D), and lysine (K). Red arrows indicate conserved residues in all the species, and purple arrows indicate residues not conserved in ascidians. The information for residues involved in L-glutamate binding can be found on Uniprot (<https://www.uniprot.org>) and previous study [59].



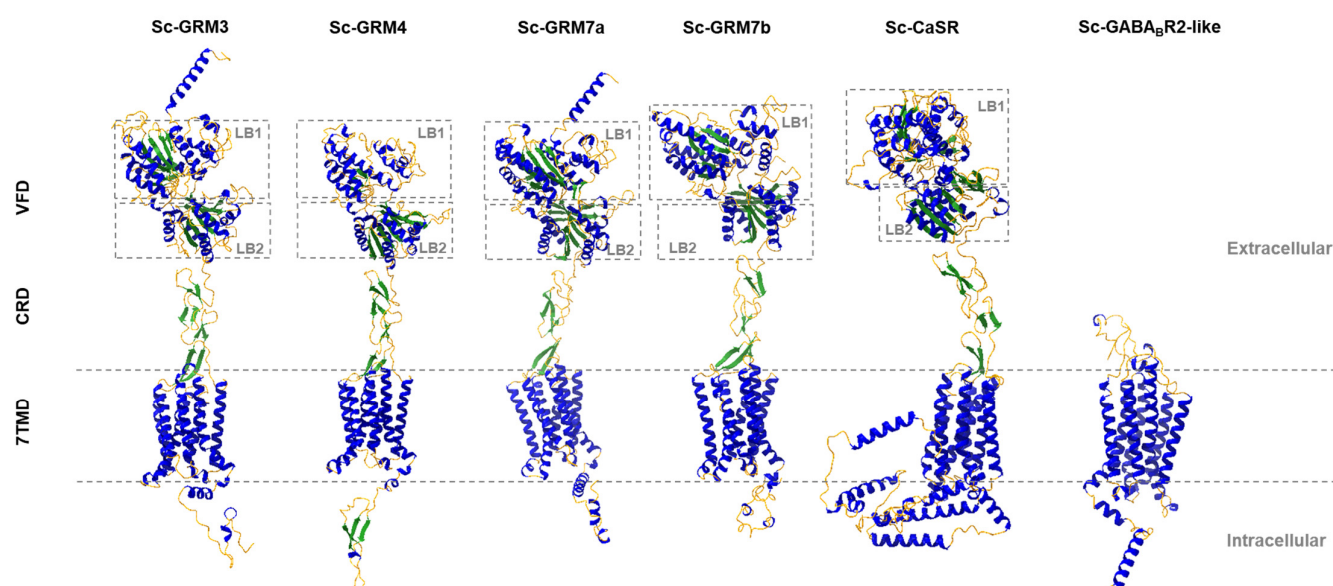

**Figure S2.** Tertiary structure prediction of *S. clava* Class C GPCRs by RoseTTAFold. Structures were predicted by deep-learning method using RoseTTAFold Public Server and visualized in the Ribbon diagram, in which the  $\alpha$ -helices,  $\beta$ -sheets, and random coils are shown in blue, green, and yellow, respectively. The VFD of each receptor contains lobe 1 (LB1) and lobe 2 (LB2).



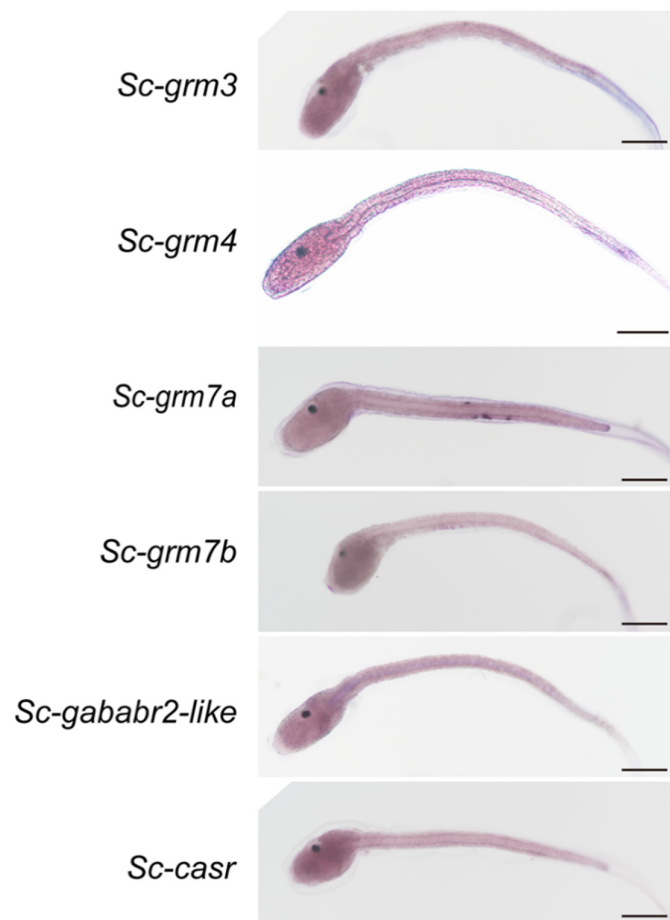

**Figure S3.** Whole-mount in situ hybridization of genes encoding *S. clava* Class C GPCRs in swimming larvae (negative controls with sense probe). Scale bar: 100  $\mu$ M.



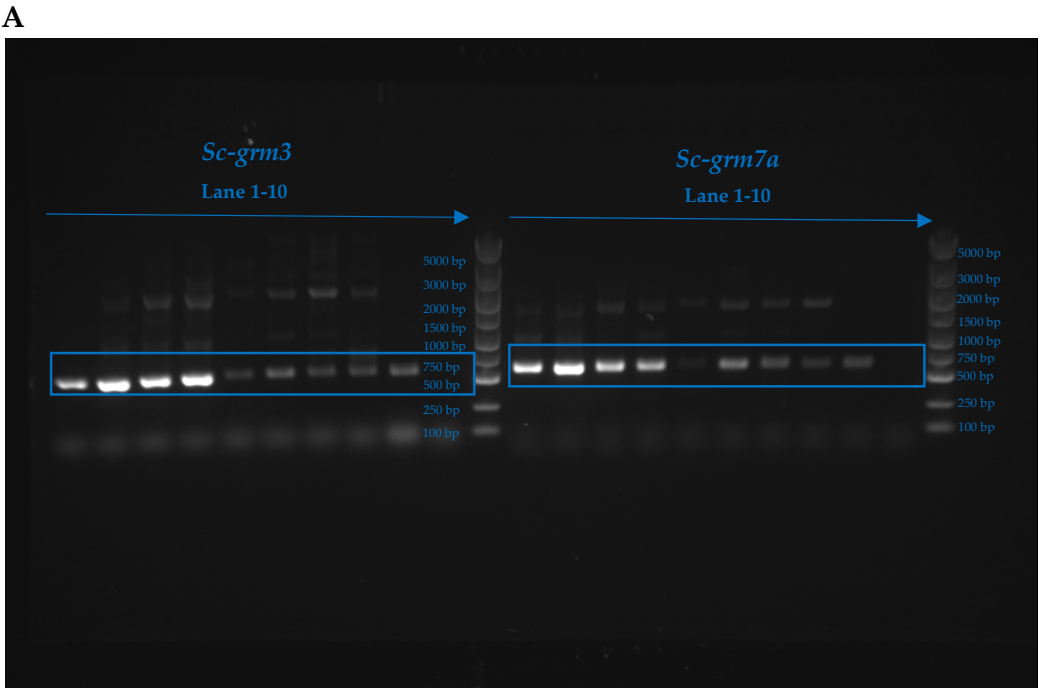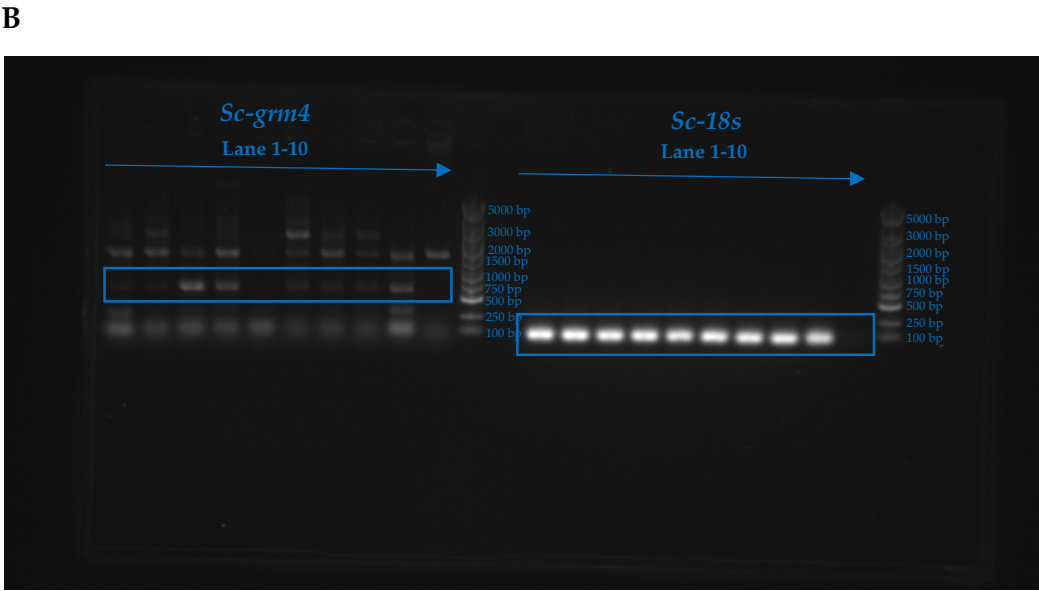



C

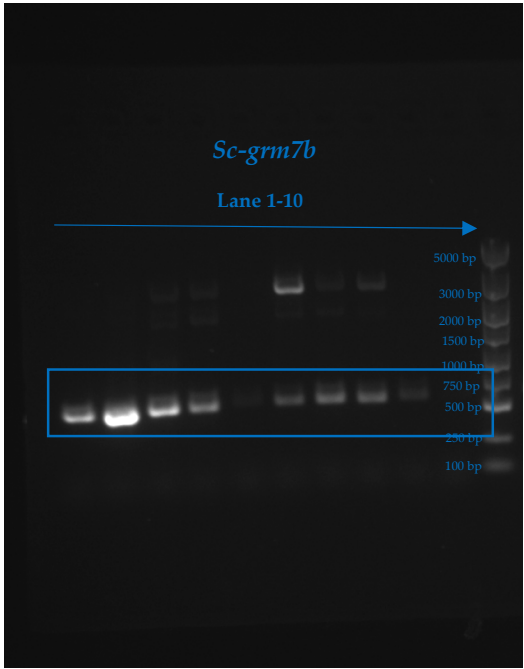

D

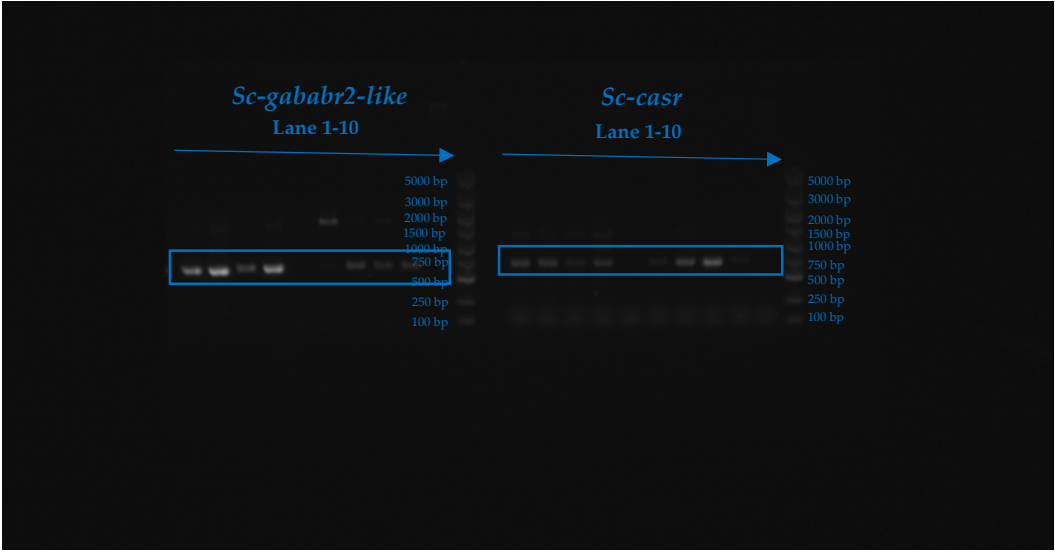

E

| Gene Name       | Intensity |           |           |           |           |           |           |           |           |       |
|-----------------|-----------|-----------|-----------|-----------|-----------|-----------|-----------|-----------|-----------|-------|
|                 | En        | Ph        | Tu        | Si        | Sp        | Eg        | In        | St        | Ga        | Neg.  |
| sc-grm3         | 26115.054 | 40905.246 | 35248.125 | 38506.196 | 3083.276  | 9303.468  | 4197.276  | 5058.690  | 9490.054  | 0.000 |
| sc-grm4         | 1364.104  | 1149.154  | 39735.974 | 19146.560 | 142.556   | 3683.024  | 2713.660  | 2814.832  | 18002.167 | 0.000 |
| sc-grm7a        | 31291.347 | 40424.660 | 29564.589 | 24164.711 | 841.991   | 13654.004 | 6215.225  | 2654.376  | 4866.033  | 0.000 |
| sc-grm7b        | 22531.468 | 44875.075 | 24595.125 | 12569.054 | 422.991   | 3965.861  | 7686.761  | 6234.518  | 1402.719  | 0.000 |
| sc-gababr2-like | 26430.882 | 38625.539 | 10470.711 | 33878.368 | 152.021   | 378.092   | 5871.418  | 3001.276  | 3931.640  | 0.000 |
| sc-casr         | 14842.761 | 14780.489 | 4600.054  | 10416.075 | 645.790   | 3423.761  | 20544.660 | 36763.610 | 2144.468  | 0.000 |
| sc-18s          | 51269.903 | 52838.903 | 50597.439 | 50680.853 | 47086.782 | 49594.146 | 49039.560 | 48201.439 | 44493.459 | 0.000 |

| Gene Name       | Ratio |       |       |       |       |       |       |       |       |      |
|-----------------|-------|-------|-------|-------|-------|-------|-------|-------|-------|------|
|                 | En    | Ph    | Tu    | Si    | Sp    | Eg    | In    | St    | Ga    | Neg. |
| sc-grm3         | 0.509 | 0.774 | 0.697 | 0.760 | 0.065 | 0.188 | 0.086 | 0.105 | 0.213 | N/A  |
| sc-grm4         | 0.027 | 0.022 | 0.785 | 0.378 | 0.003 | 0.074 | 0.055 | 0.058 | 0.405 | N/A  |
| sc-grm7a        | 0.610 | 0.765 | 0.584 | 0.477 | 0.018 | 0.275 | 0.127 | 0.055 | 0.109 | N/A  |
| sc-grm7b        | 0.439 | 0.849 | 0.486 | 0.248 | 0.009 | 0.080 | 0.157 | 0.129 | 0.032 | N/A  |
| sc-gababr2-like | 0.516 | 0.731 | 0.207 | 0.668 | 0.003 | 0.008 | 0.120 | 0.062 | 0.088 | N/A  |
| sc-casr         | 0.290 | 0.280 | 0.091 | 0.206 | 0.014 | 0.069 | 0.419 | 0.763 | 0.048 | N/A  |
| sc-18s          | 1.000 | 1.000 | 1.000 | 1.000 | 1.000 | 1.000 | 1.000 | 1.000 | 1.000 | N/A  |

| Gene Name       | Relative Expression |       |        |        |       |       |       |       |        |      |
|-----------------|---------------------|-------|--------|--------|-------|-------|-------|-------|--------|------|
|                 | En                  | Ph    | Tu     | Si     | Sp    | Eg    | In    | St    | Ga     | Neg. |
| sc-grm3         | 1.000               | 1.520 | 1.368  | 1.492  | 0.129 | 0.368 | 0.168 | 0.206 | 0.419  | N/A  |
| sc-grm4         | 1.000               | 0.817 | 29.517 | 14.199 | 0.114 | 2.791 | 2.080 | 2.195 | 15.207 | N/A  |
| sc-grm7a        | 1.000               | 1.254 | 0.957  | 0.781  | 0.029 | 0.451 | 0.208 | 0.090 | 0.179  | N/A  |
| sc-grm7b        | 1.000               | 1.933 | 1.106  | 0.564  | 0.020 | 0.182 | 0.357 | 0.294 | 0.072  | N/A  |
| sc-gababr2-like | 1.000               | 1.418 | 0.401  | 1.297  | 0.006 | 0.015 | 0.232 | 0.121 | 0.171  | N/A  |
| sc-casr         | 1.000               | 0.966 | 0.314  | 0.710  | 0.047 | 0.238 | 1.447 | 2.635 | 0.166  | N/A  |
| sc-18s          | 1.000               | 1.000 | 1.000  | 1.000  | 1.000 | 1.000 | 1.000 | 1.000 | 1.000  | N/A  |

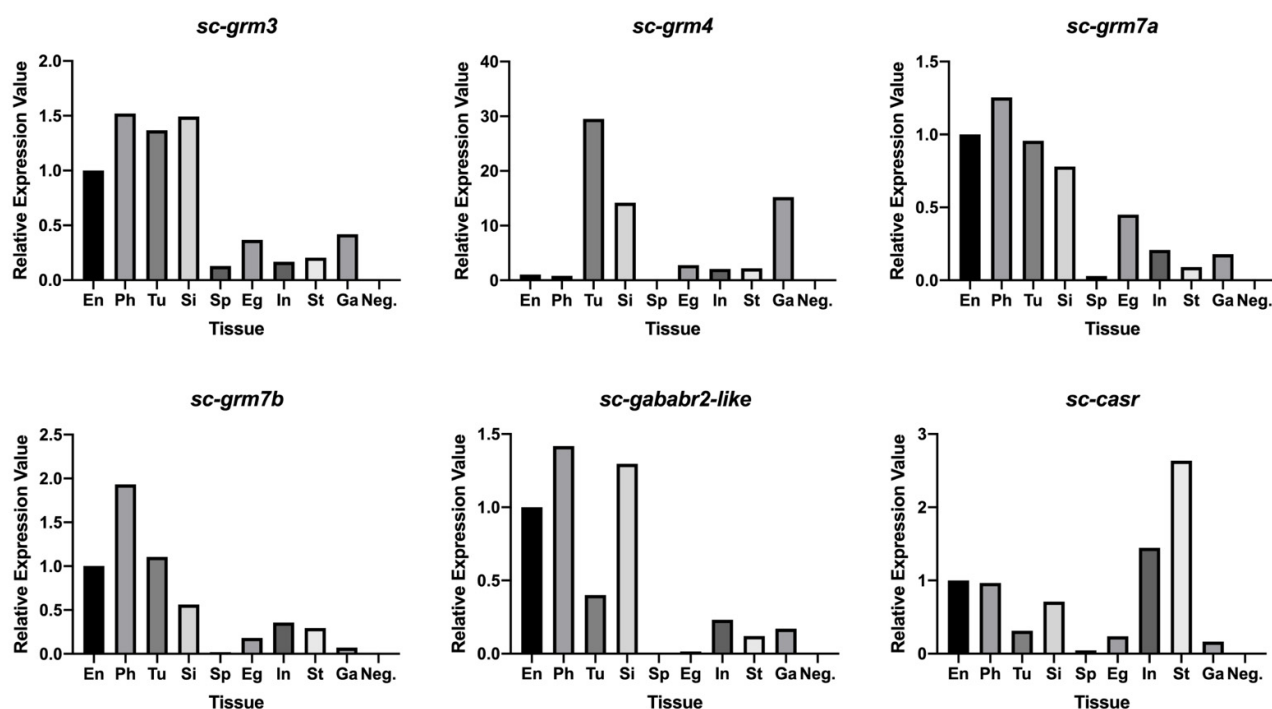

**Figure S4.** The original DNA gel images with densitometry readings related to Figure 6. (A) Whole DNA gel for RT-PCR of *Sc-grm3* and *Sc-grm7a*; (B) Whole DNA gel for RT-PCR of *Sc-grm4* and *Sc-18s*; (C) Whole DNA gel for RT-PCR of *Sc-grm7b*; (D) Whole DNA gel for RT-PCR of *Sc-gababr2-like* and *Sc-casr*; (E) The intensity values and calculated ratios of bands in DNA gels, and relative expression levels of *S. clava* Class C GPCR genes in different tissues.
